# Supplementary material for: The Genome Reverse Compiler: an explorative annotation tool
Source: PubMed Central journal article supplement (PMC2640359; doi:10.1186/1471-2105-10-35), 2009-01-27
Supplement: 1471-2105-10-35-S1.pdf [file 1471-2105-10-35-S1.pdf]

Table 1: Annotation performance using GO verification. Number of TP that have term assignments which are Confirmed, Compatible, and Incompatible.

| <b>E. coli</b> |           |                      |                     |                      |                        |
|----------------|-----------|----------------------|---------------------|----------------------|------------------------|
| <b>ID</b>      | <b>TP</b> | <b>TP-Verifiable</b> | <b>TP Confirmed</b> | <b>TP Compatible</b> | <b>TP Incompatible</b> |
| APEC01         | 4144      | 2806                 | 2806                | 472                  | 283                    |
| CFT073         | 4222      | 2915                 | 2913                | 97                   | 130                    |
| H7EDL933       | 4524      | 3037                 | 3036                | 39                   | 47                     |
| H7Sakai        | 4516      | 3018                 | 3017                | 58                   | 62                     |
| UTI89Min       | 4113      | 2845                 | 2845                | 89                   | 94                     |
| W3110Min       | 3753      | 2804                 | 2799                | 39                   | 52                     |
| <b>Pseudo.</b> |           |                      |                     |                      |                        |
| <b>ID</b>      | <b>TP</b> | <b>TP-Verifiable</b> | <b>TP Confirmed</b> | <b>TP Compatible</b> | <b>TP Incompatible</b> |
| aerPAO1        | 5035      | 3031                 | 3011                | 236                  | 307                    |
| entL48         | 4597      | 2746                 | 2721                | 359                  | 707                    |
| fluPf5         | 5583      | 3376                 | 3354                | 169                  | 289                    |
| fluPfO1        | 5226      | 3132                 | 3109                | 218                  | 338                    |
| pha1448A       | 4502      | 2758                 | 2738                | 125                  | 212                    |
| puKT2440       | 4742      | 2852                 | 2828                | 284                  | 256                    |
| syrB728a       | 4682      | 2839                 | 2818                | 194                  | 195                    |
| syrDC3000      | 4857      | 2791                 | 2776                | 206                  | 189                    |
| <b>Gamma.</b>  |           |                      |                     |                      |                        |
| <b>ID</b>      | <b>TP</b> | <b>TP-Verifiable</b> | <b>TP Confirmed</b> | <b>TP Compatible</b> | <b>TP Incompatible</b> |
| aerPAO1        | 4797      | 2819                 | 2771                | 873                  | 993                    |
| CO92           | 3378      | 2312                 | 2308                | 511                  | 742                    |
| KW20           | 1459      | 1155                 | 1152                | 88                   | 220                    |
| N16961         | 2251      | 1542                 | 1533                | 269                  | 372                    |
| RSA493         | 1418      | 830                  | 804                 | 182                  | 188                    |
| W3110          | 3698      | 2620                 | 2603                | 186                  | 187                    |

Table 2: Annotation performance using GO verification. Number of term assignments classified as Confirmed, Compatible, and Incompatible. Also the average depth of each class of term and the distance to the deepest, most specific, reference GO term.

| E. coli   |              |             |               |                 |                 |                |                 |
|-----------|--------------|-------------|---------------|-----------------|-----------------|----------------|-----------------|
| ID        | Term Confirm | Term Compat | Term Incompat | Avg. Con. Dist. | Avg. Con. Depth | Avg. Com. Dist | Avg. Com. Depth |
| APEC01    | 13278        | 660         | 485           | 0.09            | 3.77            | 2.49           | 4.9             |
| CFT073    | 13580        | 145         | 208           | 0.02            | 3.8             | 2.32           | 4.53            |
| H7EDL933  | 14731        | 52          | 66            | 0.01            | 3.83            | 2.29           | 4.65            |
| H7Sakai   | 14694        | 80          | 84            | 0.01            | 3.83            | 2.09           | 4.61            |
| UTI89Min  | 13158        | 118         | 146           | 0.02            | 3.8             | 2.31           | 4.74            |
| W3110Min  | 13855        | 60          | 67            | 0.01            | 3.84            | 2.6            | 4.58            |
| Pseudo.   |              |             |               |                 |                 |                |                 |
| ID        | Term Confirm | Term Compat | Term Incompat | Avg. Con. Dist. | Avg. Con. Depth | Avg. Com. Dist | Avg. Com. Depth |
| aerPAO1   | 12704        | 303         | 420           | 0.06            | 3.8             | 2.21           | 4.15            |
| entL48    | 10616        | 482         | 1092          | 0.16            | 3.77            | 2.39           | 4.78            |
| fluPf5    | 14101        | 201         | 371           | 0.02            | 3.8             | 2.03           | 4.02            |
| fluPfO1   | 13210        | 275         | 441           | 0.05            | 3.78            | 2.34           | 4.44            |
| pha1448A  | 11714        | 167         | 312           | 0.02            | 3.83            | 2.41           | 4.65            |
| puKT2440  | 10838        | 341         | 330           | 0.08            | 3.81            | 2.37           | 4.65            |
| syrB728a  | 12167        | 259         | 254           | 0.04            | 3.79            | 2.46           | 4.51            |
| syrDC3000 | 12002        | 254         | 253           | 0.05            | 3.8             | 2.43           | 4.59            |
| Gamma.    |              |             |               |                 |                 |                |                 |
| ID        | Term Confirm | Term Compat | Term Incompat | Avg. Con. Dist. | Avg. Con. Depth | Avg. Com. Dist | Avg. Com. Depth |
| aerPAO1   | 12631        | 1344        | 1913          | 0.22            | 3.75            | 2.26           | 4.52            |
| CO92      | 11742        | 770         | 1185          | 0.09            | 3.85            | 2.25           | 4.66            |
| KW20      | 6732         | 132         | 321           | 0.03            | 3.95            | 2.47           | 4.66            |
| N16961    | 8165         | 374         | 616           | 0.08            | 3.9             | 2.4            | 4.82            |
| RSA493    | 4036         | 282         | 335           | 0.1             | 3.9             | 2.58           | 4.77            |
| W3110     | 12913        | 271         | 302           | 0.03            | 3.84            | 2.54           | 4.81            |

Table 3: Performance in gene finding for GRC for the Gamma. group across all minimum lengths. Here DE, another type of False Negative, stands for “does not exist” and means that the corresponding ORF for a reference gene was not created in the initial scan of the genome. “Start Fraction” refers to the fraction of True positives which have start sites correctly predicted.

| Gamma GRC |             |      |     |     |       |     |    |           |             |               |                |
|-----------|-------------|------|-----|-----|-------|-----|----|-----------|-------------|---------------|----------------|
| Name      | Min. Length | TP   | FP  | NRP | TN    | FN  | DE | Precision | Sensitivity | Start Correct | Start Fraction |
| aerPAO1   | 100         | 4986 | 155 | 221 | 40677 | 579 | 0  | 0.93      | 0.90        | 3507          | 0.70           |
| aerPAO1   | 150         | 4982 | 133 | 156 | 30090 | 572 | 0  | 0.95      | 0.90        | 3503          | 0.70           |
| aerPAO1   | 200         | 4954 | 105 | 110 | 22914 | 544 | 11 | 0.96      | 0.90        | 3484          | 0.70           |
| aerPAO1   | 250         | 4889 | 99  | 71  | 17972 | 496 | 16 | 0.97      | 0.91        | 3433          | 0.70           |
| aerPAO1   | 300         | 4776 | 99  | 44  | 14683 | 451 | 32 | 0.97      | 0.91        | 3362          | 0.70           |
| CO92      | 100         | 3558 | 66  | 258 | 32917 | 321 | 2  | 0.92      | 0.92        | 2781          | 0.78           |
| CO92      | 150         | 3552 | 44  | 194 | 15622 | 300 | 2  | 0.94      | 0.92        | 2777          | 0.78           |
| CO92      | 200         | 3514 | 34  | 157 | 7458  | 243 | 19 | 0.95      | 0.93        | 2747          | 0.78           |
| CO92      | 250         | 3455 | 28  | 148 | 3639  | 177 | 20 | 0.95      | 0.95        | 2692          | 0.78           |
| CO92      | 300         | 3369 | 26  | 141 | 1907  | 118 | 28 | 0.95      | 0.96        | 2623          | 0.78           |
| KW20      | 100         | 1517 | 13  | 79  | 9551  | 140 | 0  | 0.94      | 0.92        | 1261          | 0.83           |
| KW20      | 150         | 1513 | 7   | 68  | 3782  | 128 | 1  | 0.95      | 0.92        | 1260          | 0.83           |
| KW20      | 200         | 1501 | 6   | 65  | 1455  | 122 | 0  | 0.95      | 0.92        | 1250          | 0.83           |
| KW20      | 250         | 1481 | 5   | 57  | 622   | 107 | 1  | 0.96      | 0.93        | 1233          | 0.83           |
| KW20      | 300         | 1439 | 5   | 51  | 265   | 82  | 8  | 0.96      | 0.94        | 1192          | 0.83           |
| N16961    | 100         | 2369 | 22  | 48  | 21855 | 313 | 18 | 0.97      | 0.88        | 1567          | 0.66           |
| N16961    | 150         | 2361 | 17  | 36  | 10514 | 203 | 4  | 0.98      | 0.92        | 1559          | 0.66           |
| N16961    | 200         | 2345 | 13  | 34  | 5130  | 150 | 14 | 0.98      | 0.93        | 1546          | 0.66           |
| N16961    | 250         | 2311 | 10  | 33  | 2514  | 112 | 16 | 0.98      | 0.95        | 1522          | 0.66           |
| N16961    | 300         | 2258 | 10  | 30  | 1335  | 89  | 23 | 0.98      | 0.95        | 1479          | 0.66           |
| RSA493    | 100         | 1536 | 76  | 122 | 11076 | 436 | 12 | 0.89      | 0.77        | 1185          | 0.77           |
| RSA493    | 150         | 1516 | 43  | 88  | 4657  | 332 | 3  | 0.92      | 0.82        | 1166          | 0.77           |
| RSA493    | 200         | 1498 | 33  | 75  | 1934  | 269 | 6  | 0.93      | 0.84        | 1151          | 0.77           |
| RSA493    | 250         | 1469 | 31  | 68  | 872   | 229 | 10 | 0.94      | 0.86        | 1124          | 0.76           |
| RSA493    | 300         | 1414 | 25  | 62  | 436   | 205 | 22 | 0.94      | 0.86        | 1086          | 0.77           |
| W3110     | 100         | 3911 | 48  | 123 | 35568 | 303 | 2  | 0.96      | 0.93        | 3113          | 0.80           |
| W3110     | 150         | 3905 | 35  | 77  | 19081 | 276 | 6  | 0.97      | 0.93        | 3111          | 0.80           |
| W3110     | 200         | 3872 | 27  | 62  | 10285 | 231 | 18 | 0.98      | 0.94        | 3088          | 0.80           |
| W3110     | 250         | 3790 | 26  | 54  | 5964  | 179 | 17 | 0.98      | 0.95        | 3024          | 0.80           |
| W3110     | 300         | 3687 | 25  | 49  | 3719  | 120 | 21 | 0.98      | 0.96        | 2939          | 0.80           |

Table 4: Performance in gene finding for GRC for the Pseudo. group across all minimum lengths.

| Pseudo GRC |             |      |     |     |       |     |    |           |             |               |                |
|------------|-------------|------|-----|-----|-------|-----|----|-----------|-------------|---------------|----------------|
| Name       | Min. Length | TP   | FP  | NRP | TN    | FN  | DE | Precision | Sensitivity | Start Correct | Start Fraction |
| aerPAO1    | 100         | 5215 | 114 | 149 | 40790 | 349 | 1  | 0.95      | 0.94        | 4205          | 0.81           |
| aerPAO1    | 150         | 5210 | 106 | 106 | 30164 | 341 | 3  | 0.96      | 0.94        | 4200          | 0.81           |
| aerPAO1    | 200         | 5183 | 94  | 86  | 22943 | 313 | 13 | 0.97      | 0.94        | 4178          | 0.81           |
| aerPAO1    | 250         | 5112 | 92  | 62  | 17976 | 266 | 23 | 0.97      | 0.95        | 4121          | 0.81           |
| aerPAO1    | 300         | 5017 | 101 | 44  | 14666 | 211 | 31 | 0.97      | 0.95        | 4047          | 0.80           |
| entL48     | 100         | 4825 | 44  | 103 | 47099 | 300 | 0  | 0.97      | 0.94        | 4060          | 0.84           |
| entL48     | 150         | 4815 | 36  | 73  | 33030 | 279 | 9  | 0.98      | 0.94        | 4054          | 0.84           |
| entL48     | 200         | 4763 | 30  | 56  | 23564 | 228 | 18 | 0.98      | 0.95        | 4015          | 0.84           |
| entL48     | 250         | 4682 | 28  | 52  | 17396 | 145 | 24 | 0.98      | 0.97        | 3944          | 0.84           |
| entL48     | 300         | 4558 | 38  | 43  | 13469 | 91  | 27 | 0.98      | 0.97        | 3848          | 0.84           |
| fluPf5     | 100         | 5821 | 115 | 283 | 54564 | 312 | 1  | 0.94      | 0.95        | 4540          | 0.78           |
| fluPf5     | 150         | 5816 | 103 | 215 | 37444 | 285 | 3  | 0.95      | 0.95        | 4536          | 0.78           |
| fluPf5     | 200         | 5770 | 89  | 176 | 26244 | 232 | 21 | 0.96      | 0.96        | 4503          | 0.78           |
| fluPf5     | 250         | 5684 | 93  | 146 | 19227 | 184 | 38 | 0.96      | 0.96        | 4442          | 0.78           |
| fluPf5     | 300         | 5567 | 100 | 119 | 14814 | 138 | 47 | 0.96      | 0.97        | 4349          | 0.78           |
| fluPfO1    | 100         | 5472 | 46  | 87  | 51537 | 261 | 0  | 0.98      | 0.95        | 4578          | 0.84           |
| fluPfO1    | 150         | 5467 | 40  | 57  | 33715 | 256 | 2  | 0.98      | 0.95        | 4575          | 0.84           |
| fluPfO1    | 200         | 5420 | 29  | 38  | 22526 | 213 | 23 | 0.99      | 0.96        | 4539          | 0.84           |
| fluPfO1    | 250         | 5334 | 30  | 25  | 15843 | 156 | 35 | 0.99      | 0.97        | 4472          | 0.84           |
| fluPfO1    | 300         | 5205 | 36  | 25  | 11893 | 98  | 43 | 0.99      | 0.97        | 4369          | 0.84           |
| pha1448A   | 100         | 4790 | 122 | 411 | 51473 | 169 | 3  | 0.90      | 0.97        | 3901          | 0.81           |
| pha1448A   | 150         | 4777 | 103 | 346 | 31724 | 125 | 3  | 0.91      | 0.97        | 3891          | 0.81           |
| pha1448A   | 200         | 4729 | 92  | 305 | 19892 | 103 | 15 | 0.92      | 0.98        | 3853          | 0.81           |
| pha1448A   | 250         | 4637 | 86  | 278 | 13230 | 79  | 33 | 0.93      | 0.98        | 3784          | 0.82           |
| pha1448A   | 300         | 4515 | 88  | 246 | 9357  | 60  | 40 | 0.93      | 0.98        | 3684          | 0.82           |
| puKT2440   | 100         | 4989 | 135 | 328 | 53125 | 348 | 2  | 0.92      | 0.93        | 3824          | 0.77           |
| puKT2440   | 150         | 4975 | 124 | 296 | 35497 | 299 | 6  | 0.92      | 0.94        | 3814          | 0.77           |
| puKT2440   | 200         | 4939 | 117 | 259 | 24027 | 226 | 21 | 0.93      | 0.95        | 3787          | 0.77           |
| puKT2440   | 250         | 4856 | 107 | 234 | 16931 | 171 | 33 | 0.93      | 0.96        | 3723          | 0.77           |
| puKT2440   | 300         | 4734 | 101 | 199 | 12580 | 126 | 53 | 0.94      | 0.96        | 3633          | 0.77           |
| syrB728a   | 100         | 4950 | 84  | 207 | 51827 | 138 | 0  | 0.94      | 0.97        | 4218          | 0.85           |
| syrB728a   | 150         | 4947 | 69  | 153 | 32591 | 130 | 6  | 0.96      | 0.97        | 4216          | 0.85           |
| syrB728a   | 200         | 4906 | 61  | 112 | 20816 | 109 | 13 | 0.97      | 0.98        | 4181          | 0.85           |
| syrB728a   | 250         | 4805 | 51  | 84  | 14100 | 78  | 23 | 0.97      | 0.98        | 4100          | 0.85           |
| syrB728a   | 300         | 4667 | 53  | 71  | 10340 | 50  | 47 | 0.97      | 0.98        | 3982          | 0.85           |
| syrDC3000  | 100         | 5145 | 126 | 432 | 54620 | 311 | 5  | 0.90      | 0.94        | 4091          | 0.80           |
| syrDC3000  | 150         | 5125 | 104 | 345 | 33846 | 231 | 10 | 0.92      | 0.96        | 4075          | 0.79           |
| syrDC3000  | 200         | 5077 | 91  | 290 | 21556 | 165 | 17 | 0.93      | 0.97        | 4038          | 0.79           |
| syrDC3000  | 250         | 4975 | 85  | 252 | 14486 | 105 | 39 | 0.94      | 0.97        | 3962          | 0.79           |
| syrDC3000  | 300         | 4848 | 87  | 228 | 10312 | 73  | 36 | 0.94      | 0.98        | 3865          | 0.79           |

Table 5: Performance in gene finding for GRC for the E.coli group across all minimum lengths.

| E. coli GRC |             |      |     |     |       |     |    |           |             |               |                |
|-------------|-------------|------|-----|-----|-------|-----|----|-----------|-------------|---------------|----------------|
| Name        | Min. Length | TP   | FP  | NRP | TN    | FN  | DE | Precision | Sensitivity | Start Correct | Start Fraction |
| APEC01      | 100         | 4309 | 273 | 429 | 38539 | 148 | 0  | 0.86      | 0.97        | 3524          | 0.82           |
| APEC01      | 150         | 4308 | 206 | 285 | 20548 | 148 | 1  | 0.90      | 0.97        | 3524          | 0.82           |
| APEC01      | 200         | 4308 | 153 | 179 | 11043 | 145 | 4  | 0.93      | 0.97        | 3525          | 0.82           |
| APEC01      | 250         | 4296 | 95  | 72  | 6249  | 132 | 27 | 0.96      | 0.96        | 3526          | 0.82           |
| APEC01      | 300         | 4133 | 74  | 46  | 3848  | 99  | 38 | 0.97      | 0.97        | 3400          | 0.82           |
| CFT073      | 100         | 4699 | 104 | 215 | 39308 | 666 | 4  | 0.94      | 0.88        | 3676          | 0.78           |
| CFT073      | 150         | 4615 | 83  | 150 | 20829 | 493 | 23 | 0.95      | 0.90        | 3602          | 0.78           |
| CFT073      | 200         | 4502 | 69  | 121 | 11241 | 342 | 30 | 0.96      | 0.92        | 3504          | 0.78           |
| CFT073      | 250         | 4350 | 63  | 96  | 6275  | 276 | 39 | 0.96      | 0.93        | 3385          | 0.78           |
| CFT073      | 300         | 4202 | 37  | 73  | 3827  | 232 | 40 | 0.97      | 0.94        | 3271          | 0.78           |
| H7EDL933    | 100         | 4996 | 254 | 286 | 41751 | 271 | 10 | 0.90      | 0.95        | 4073          | 0.81           |
| H7EDL933    | 150         | 4957 | 199 | 155 | 22157 | 209 | 19 | 0.93      | 0.96        | 4049          | 0.82           |
| H7EDL933    | 200         | 4861 | 134 | 83  | 11908 | 157 | 27 | 0.96      | 0.96        | 3975          | 0.82           |
| H7EDL933    | 250         | 4695 | 101 | 41  | 6829  | 113 | 42 | 0.97      | 0.97        | 3846          | 0.82           |
| H7EDL933    | 300         | 4485 | 78  | 17  | 4294  | 88  | 43 | 0.98      | 0.97        | 3678          | 0.82           |
| H7Sakai     | 100         | 4939 | 147 | 360 | 41561 | 299 | 4  | 0.91      | 0.94        | 4159          | 0.84           |
| H7Sakai     | 150         | 4912 | 94  | 202 | 22068 | 285 | 11 | 0.94      | 0.94        | 4137          | 0.84           |
| H7Sakai     | 200         | 4818 | 63  | 138 | 11906 | 208 | 17 | 0.96      | 0.96        | 4060          | 0.84           |
| H7Sakai     | 250         | 4637 | 59  | 111 | 6829  | 123 | 23 | 0.96      | 0.97        | 3912          | 0.84           |
| H7Sakai     | 300         | 4416 | 50  | 94  | 4293  | 87  | 28 | 0.97      | 0.97        | 3735          | 0.84           |
| UTI89       | 100         | 4599 | 92  | 162 | 38251 | 431 | 7  | 0.95      | 0.91        | 3648          | 0.79           |
| UTI89       | 150         | 4522 | 45  | 83  | 20252 | 396 | 16 | 0.97      | 0.92        | 3577          | 0.79           |
| UTI89       | 200         | 4408 | 33  | 59  | 10891 | 303 | 29 | 0.98      | 0.93        | 3473          | 0.79           |
| UTI89       | 250         | 4273 | 28  | 46  | 6138  | 247 | 36 | 0.98      | 0.94        | 3366          | 0.79           |
| UTI89       | 300         | 4100 | 28  | 42  | 3778  | 173 | 41 | 0.98      | 0.95        | 3225          | 0.79           |
| W3110       | 100         | 4073 | 120 | 240 | 35363 | 141 | 2  | 0.92      | 0.97        | 3372          | 0.83           |
| W3110       | 150         | 4052 | 85  | 140 | 18928 | 128 | 7  | 0.95      | 0.97        | 3359          | 0.83           |
| W3110       | 200         | 4003 | 63  | 87  | 10185 | 105 | 13 | 0.96      | 0.97        | 3319          | 0.83           |
| W3110       | 250         | 3887 | 55  | 66  | 5887  | 88  | 11 | 0.97      | 0.98        | 3228          | 0.83           |
| W3110       | 300         | 3737 | 41  | 51  | 3667  | 72  | 19 | 0.98      | 0.98        | 3116          | 0.83           |

Table 6: Performance in gene finding for Glimmer for the Gamma. group across all minimum lengths.

| Gamma Glimmer |           |      |     |     |    |    |     |           |             |               |                |
|---------------|-----------|------|-----|-----|----|----|-----|-----------|-------------|---------------|----------------|
| Name          | MinLength | TP   | FP  | NRP | TN | FN | DE  | Precision | Sensitivity | Start Correct | Start Fraction |
| aerPAO1       | 100       | 5492 | 237 | 181 | 0  | 0  | 73  | 0.93      | 0.99        | 4702          | 0.82           |
| aerPAO1       | 150       | 5480 | 167 | 117 | 0  | 0  | 74  | 0.95      | 0.99        | 4710          | 0.83           |
| aerPAO1       | 200       | 5431 | 119 | 65  | 0  | 0  | 78  | 0.97      | 0.99        | 4681          | 0.84           |
| aerPAO1       | 250       | 5330 | 86  | 33  | 0  | 0  | 71  | 0.98      | 0.99        | 4599          | 0.85           |
| aerPAO1       | 300       | 5188 | 76  | 21  | 0  | 0  | 71  | 0.98      | 0.99        | 4477          | 0.85           |
| CO92          | 100       | 3728 | 221 | 535 | 0  | 0  | 153 | 0.83      | 0.96        | 2870          | 0.73           |
| CO92          | 150       | 3703 | 84  | 265 | 0  | 0  | 151 | 0.91      | 0.96        | 2884          | 0.76           |
| CO92          | 200       | 3652 | 51  | 187 | 0  | 0  | 124 | 0.94      | 0.97        | 2860          | 0.77           |
| CO92          | 250       | 3566 | 35  | 165 | 0  | 0  | 86  | 0.95      | 0.98        | 2800          | 0.78           |
| CO92          | 300       | 3459 | 26  | 149 | 0  | 0  | 56  | 0.95      | 0.98        | 2716          | 0.78           |
| KW20          | 100       | 1648 | 62  | 147 | 0  | 0  | 9   | 0.89      | 0.99        | 1436          | 0.84           |
| KW20          | 150       | 1635 | 21  | 89  | 0  | 0  | 7   | 0.94      | 1           | 1426          | 0.86           |
| KW20          | 200       | 1615 | 13  | 73  | 0  | 0  | 8   | 0.95      | 1           | 1415          | 0.87           |
| KW20          | 250       | 1580 | 9   | 66  | 0  | 0  | 9   | 0.95      | 0.99        | 1388          | 0.87           |
| KW20          | 300       | 1520 | 10  | 60  | 0  | 0  | 9   | 0.96      | 0.99        | 1331          | 0.87           |
| N16961        | 100       | 2572 | 50  | 82  | 0  | 0  | 128 | 0.95      | 0.95        | 1763          | 0.67           |
| N16961        | 150       | 2503 | 18  | 60  | 0  | 0  | 65  | 0.97      | 0.97        | 1720          | 0.68           |
| N16961        | 200       | 2466 | 16  | 49  | 0  | 0  | 43  | 0.97      | 0.98        | 1698          | 0.68           |
| N16961        | 250       | 2409 | 9   | 42  | 0  | 0  | 30  | 0.98      | 0.99        | 1660          | 0.69           |
| N16961        | 300       | 2344 | 7   | 39  | 0  | 0  | 26  | 0.98      | 0.99        | 1610          | 0.68           |
| RSA493        | 100       | 1880 | 146 | 189 | 0  | 0  | 104 | 0.85      | 0.95        | 1463          | 0.72           |
| RSA493        | 150       | 1789 | 85  | 142 | 0  | 0  | 62  | 0.89      | 0.97        | 1427          | 0.76           |
| RSA493        | 200       | 1736 | 68  | 108 | 0  | 0  | 37  | 0.91      | 0.98        | 1377          | 0.76           |
| RSA493        | 250       | 1684 | 68  | 97  | 0  | 0  | 24  | 0.91      | 0.99        | 1350          | 0.77           |
| RSA493        | 300       | 1616 | 43  | 89  | 0  | 0  | 25  | 0.92      | 0.98        | 1296          | 0.78           |
| W3110         | 100       | 4104 | 169 | 294 | 0  | 0  | 112 | 0.9       | 0.97        | 3560          | 0.83           |
| W3110         | 150       | 4081 | 74  | 105 | 0  | 0  | 106 | 0.96      | 0.97        | 3573          | 0.86           |
| W3110         | 200       | 4029 | 39  | 62  | 0  | 0  | 92  | 0.98      | 0.98        | 3538          | 0.87           |
| W3110         | 250       | 3909 | 30  | 44  | 0  | 0  | 77  | 0.98      | 0.98        | 3435          | 0.87           |
| W3110         | 300       | 3771 | 22  | 42  | 0  | 0  | 57  | 0.98      | 0.99        | 3335          | 0.88           |

Table 7: Performance in gene finding for Glimmer for the Pseudo. group across all minimum lengths.

| Pseudo Glimmer |           |      |     |     |    |    |     |           |             |               |                |
|----------------|-----------|------|-----|-----|----|----|-----|-----------|-------------|---------------|----------------|
| Name           | MinLength | TP   | FP  | NRP | TN | FN | DE  | Precision | Sensitivity | Start Correct | Start Fraction |
| aerPAO1        | 100       | 5492 | 237 | 181 | 0  | 0  | 73  | 0.93      | 0.99        | 4702          | 0.82           |
| aerPAO1        | 150       | 5480 | 167 | 117 | 0  | 0  | 74  | 0.95      | 0.99        | 4710          | 0.83           |
| aerPAO1        | 200       | 5431 | 119 | 65  | 0  | 0  | 78  | 0.97      | 0.99        | 4681          | 0.84           |
| aerPAO1        | 250       | 5330 | 86  | 33  | 0  | 0  | 71  | 0.98      | 0.99        | 4599          | 0.85           |
| aerPAO1        | 300       | 5188 | 76  | 21  | 0  | 0  | 71  | 0.98      | 0.99        | 4477          | 0.85           |
| entL48         | 100       | 4967 | 202 | 174 | 0  | 0  | 160 | 0.93      | 0.97        | 4187          | 0.81           |
| entL48         | 150       | 4943 | 90  | 70  | 0  | 0  | 160 | 0.97      | 0.97        | 4188          | 0.83           |
| entL48         | 200       | 4857 | 51  | 38  | 0  | 0  | 152 | 0.98      | 0.97        | 4138          | 0.84           |
| entL48         | 250       | 4727 | 29  | 22  | 0  | 0  | 124 | 0.99      | 0.97        | 4015          | 0.84           |
| entL48         | 300       | 4573 | 25  | 13  | 0  | 0  | 103 | 0.99      | 0.98        | 3887          | 0.85           |
| fluPf5         | 100       | 6045 | 264 | 198 | 0  | 0  | 89  | 0.93      | 0.99        | 4568          | 0.72           |
| fluPf5         | 150       | 6020 | 154 | 95  | 0  | 0  | 84  | 0.96      | 0.99        | 4572          | 0.74           |
| fluPf5         | 200       | 5945 | 100 | 72  | 0  | 0  | 78  | 0.97      | 0.99        | 4534          | 0.75           |
| fluPf5         | 250       | 5832 | 81  | 52  | 0  | 0  | 74  | 0.98      | 0.99        | 4447          | 0.75           |
| fluPf5         | 300       | 5676 | 69  | 39  | 0  | 0  | 76  | 0.98      | 0.99        | 4340          | 0.76           |
| fluPfO1        | 100       | 5552 | 179 | 132 | 0  | 0  | 182 | 0.95      | 0.97        | 4670          | 0.81           |
| fluPfO1        | 150       | 5532 | 101 | 57  | 0  | 0  | 193 | 0.97      | 0.97        | 4674          | 0.83           |
| fluPfO1        | 200       | 5457 | 60  | 20  | 0  | 0  | 199 | 0.99      | 0.96        | 4631          | 0.84           |
| fluPfO1        | 250       | 5331 | 46  | 5   | 0  | 0  | 194 | 0.99      | 0.96        | 4534          | 0.84           |
| fluPfO1        | 300       | 5188 | 41  | 4   | 0  | 0  | 158 | 0.99      | 0.97        | 4420          | 0.85           |
| pha1448A       | 100       | 4864 | 224 | 490 | 0  | 0  | 104 | 0.87      | 0.98        | 3797          | 0.75           |
| pha1448A       | 150       | 4817 | 117 | 323 | 0  | 0  | 88  | 0.92      | 0.98        | 3785          | 0.77           |
| pha1448A       | 200       | 4756 | 83  | 264 | 0  | 0  | 91  | 0.93      | 0.98        | 3762          | 0.78           |
| pha1448A       | 250       | 4654 | 67  | 226 | 0  | 0  | 95  | 0.94      | 0.98        | 3699          | 0.78           |
| pha1448A       | 300       | 4523 | 69  | 208 | 0  | 0  | 92  | 0.94      | 0.98        | 3608          | 0.79           |
| puKT2440       | 100       | 5179 | 227 | 310 | 0  | 0  | 165 | 0.91      | 0.97        | 3856          | 0.71           |
| puKT2440       | 150       | 5135 | 150 | 191 | 0  | 0  | 145 | 0.94      | 0.97        | 3834          | 0.73           |
| puKT2440       | 200       | 5053 | 113 | 155 | 0  | 0  | 133 | 0.95      | 0.97        | 3793          | 0.73           |
| puKT2440       | 250       | 4945 | 94  | 135 | 0  | 0  | 115 | 0.96      | 0.98        | 3717          | 0.74           |
| puKT2440       | 300       | 4812 | 83  | 112 | 0  | 0  | 101 | 0.96      | 0.98        | 3622          | 0.74           |
| syrB728a       | 100       | 4944 | 226 | 285 | 0  | 0  | 144 | 0.91      | 0.97        | 4075          | 0.79           |
| syrB728a       | 150       | 4933 | 98  | 108 | 0  | 0  | 150 | 0.96      | 0.97        | 4113          | 0.82           |
| syrB728a       | 200       | 4871 | 59  | 66  | 0  | 0  | 157 | 0.97      | 0.97        | 4073          | 0.83           |
| syrB728a       | 250       | 4760 | 37  | 40  | 0  | 0  | 146 | 0.98      | 0.97        | 3994          | 0.83           |
| syrB728a       | 300       | 4627 | 34  | 32  | 0  | 0  | 137 | 0.99      | 0.97        | 3902          | 0.84           |
| syrDC3000      | 100       | 5269 | 281 | 428 | 0  | 0  | 200 | 0.88      | 0.96        | 4049          | 0.73           |
| syrDC3000      | 150       | 5202 | 129 | 240 | 0  | 0  | 164 | 0.93      | 0.97        | 4031          | 0.76           |
| syrDC3000      | 200       | 5113 | 85  | 170 | 0  | 0  | 146 | 0.95      | 0.97        | 3973          | 0.76           |
| syrDC3000      | 250       | 4993 | 66  | 143 | 0  | 0  | 126 | 0.96      | 0.98        | 3905          | 0.77           |
| syrDC3000      | 300       | 4839 | 65  | 122 | 0  | 0  | 118 | 0.96      | 0.98        | 3803          | 0.78           |

Table 8: Performance in gene finding for Glimmer for the E.coli group across all minimum lengths.

| E.coli Glimmer |           |      |     |     |    |    |     |           |             |               |                |
|----------------|-----------|------|-----|-----|----|----|-----|-----------|-------------|---------------|----------------|
| Name           | MinLength | TP   | FP  | NRP | TN | FN | DE  | Precision | Sensitivity | Start Correct | Start Fraction |
| APEC01         | 100       | 4279 | 351 | 513 | 0  | 0  | 178 | 0.83      | 0.96        | 3026          | 0.65           |
| APEC01         | 150       | 4272 | 231 | 277 | 0  | 0  | 185 | 0.89      | 0.96        | 3051          | 0.68           |
| APEC01         | 200       | 4271 | 171 | 165 | 0  | 0  | 186 | 0.93      | 0.96        | 3068          | 0.69           |
| APEC01         | 250       | 4263 | 118 | 57  | 0  | 0  | 192 | 0.96      | 0.96        | 3078          | 0.7            |
| APEC01         | 300       | 4121 | 89  | 37  | 0  | 0  | 149 | 0.97      | 0.97        | 2992          | 0.71           |
| CFT073         | 100       | 4853 | 190 | 258 | 0  | 0  | 518 | 0.92      | 0.9         | 3357          | 0.67           |
| CFT073         | 150       | 4716 | 72  | 100 | 0  | 0  | 415 | 0.96      | 0.92        | 3319          | 0.69           |
| CFT073         | 200       | 4573 | 49  | 73  | 0  | 0  | 301 | 0.97      | 0.94        | 3243          | 0.7            |
| CFT073         | 250       | 4401 | 40  | 61  | 0  | 0  | 264 | 0.98      | 0.94        | 3125          | 0.7            |
| CFT073         | 300       | 4239 | 28  | 55  | 0  | 0  | 235 | 0.98      | 0.95        | 3022          | 0.71           |
| H7EDL933       | 100       | 5079 | 383 | 383 | 0  | 0  | 205 | 0.87      | 0.96        | 3869          | 0.71           |
| H7EDL933       | 150       | 5014 | 196 | 110 | 0  | 0  | 171 | 0.94      | 0.97        | 3879          | 0.74           |
| H7EDL933       | 200       | 4900 | 124 | 45  | 0  | 0  | 145 | 0.97      | 0.97        | 3830          | 0.76           |
| H7EDL933       | 250       | 4721 | 103 | 21  | 0  | 0  | 129 | 0.97      | 0.97        | 3706          | 0.77           |
| H7EDL933       | 300       | 4515 | 81  | 13  | 0  | 0  | 101 | 0.98      | 0.98        | 3597          | 0.78           |
| H7Sakai        | 100       | 4985 | 292 | 472 | 0  | 0  | 259 | 0.87      | 0.95        | 4119          | 0.78           |
| H7Sakai        | 150       | 4958 | 113 | 194 | 0  | 0  | 250 | 0.94      | 0.95        | 4166          | 0.82           |
| H7Sakai        | 200       | 4844 | 58  | 120 | 0  | 0  | 199 | 0.96      | 0.96        | 4090          | 0.83           |
| H7Sakai        | 250       | 4649 | 46  | 98  | 0  | 0  | 134 | 0.97      | 0.97        | 3939          | 0.84           |
| H7Sakai        | 300       | 4440 | 39  | 84  | 0  | 0  | 91  | 0.97      | 0.98        | 3796          | 0.85           |
| UTI89          | 100       | 4607 | 203 | 237 | 0  | 0  | 432 | 0.91      | 0.91        | 3228          | 0.67           |
| UTI89          | 150       | 4526 | 65  | 78  | 0  | 0  | 408 | 0.97      | 0.92        | 3225          | 0.7            |
| UTI89          | 200       | 4413 | 41  | 50  | 0  | 0  | 327 | 0.98      | 0.93        | 3164          | 0.71           |
| UTI89          | 250       | 4276 | 30  | 41  | 0  | 0  | 280 | 0.98      | 0.94        | 3074          | 0.71           |
| UTI89          | 300       | 4114 | 28  | 35  | 0  | 0  | 200 | 0.98      | 0.95        | 2951          | 0.71           |
| W3110          | 100       | 4104 | 169 | 294 | 0  | 0  | 112 | 0.9       | 0.97        | 3560          | 0.83           |
| W3110          | 150       | 4081 | 74  | 105 | 0  | 0  | 106 | 0.96      | 0.97        | 3573          | 0.86           |
| W3110          | 200       | 4029 | 39  | 62  | 0  | 0  | 92  | 0.98      | 0.98        | 3538          | 0.87           |
| W3110          | 250       | 3909 | 30  | 44  | 0  | 0  | 77  | 0.98      | 0.98        | 3435          | 0.87           |
| W3110          | 300       | 3771 | 22  | 42  | 0  | 0  | 57  | 0.98      | 0.99        | 3335          | 0.88           |
